# Supplementary material
Source: PubMed Central journal article supplement (PMC3110563)
Supplement: NIHMS293002-supplement-1.pdf [file NIHMS293002-supplement-1.pdf]

**SUPPLEMENTAL TABLE 1:** Primers used in this study.

| Gene Name    | Forward Primer                 | Reverse Primer                |
|--------------|--------------------------------|-------------------------------|
| <i>EBI3</i>  | 5' GCAGCAGACGCCAACGT 3',       | 5' CCATGGAGAACAGCTGGACAT 3'   |
| <i>IL12A</i> | 5' CCTTCACCACTCCCAAAC 3'       | 5' TGTCTGGCCTTCTGGAGCAT 3'    |
| <i>IL12B</i> | 5' TTTTCTGGCATCTCCCCTCGTG 3'   | 5' GGGTGGGTCAGGTTTGATGATG 3'  |
| <i>TGFB</i>  | 5' CTGCTGAGGCTCAAGTTAAAAGTG 3' | 5' TGAGGTATCGCCAGGAATTGTT 3'  |
| <i>IL27</i>  | 5' GCGGAATCTCACCTGCCA 3';      | 5' GGAAACATCAGGGAGCTGCTC 3'   |
| <i>IL23</i>  | 5' GAGCCTTCTCTGCTCCCTGAT3'     | 5' AGTTGGCTGAGGCCAGTAG 3'     |
| <i>IL10</i>  | 5' GCCGTGGAGCAGGTGAAG 3';      | 5' TGGCTTTGTAGATGCCTTTCTCT 3' |

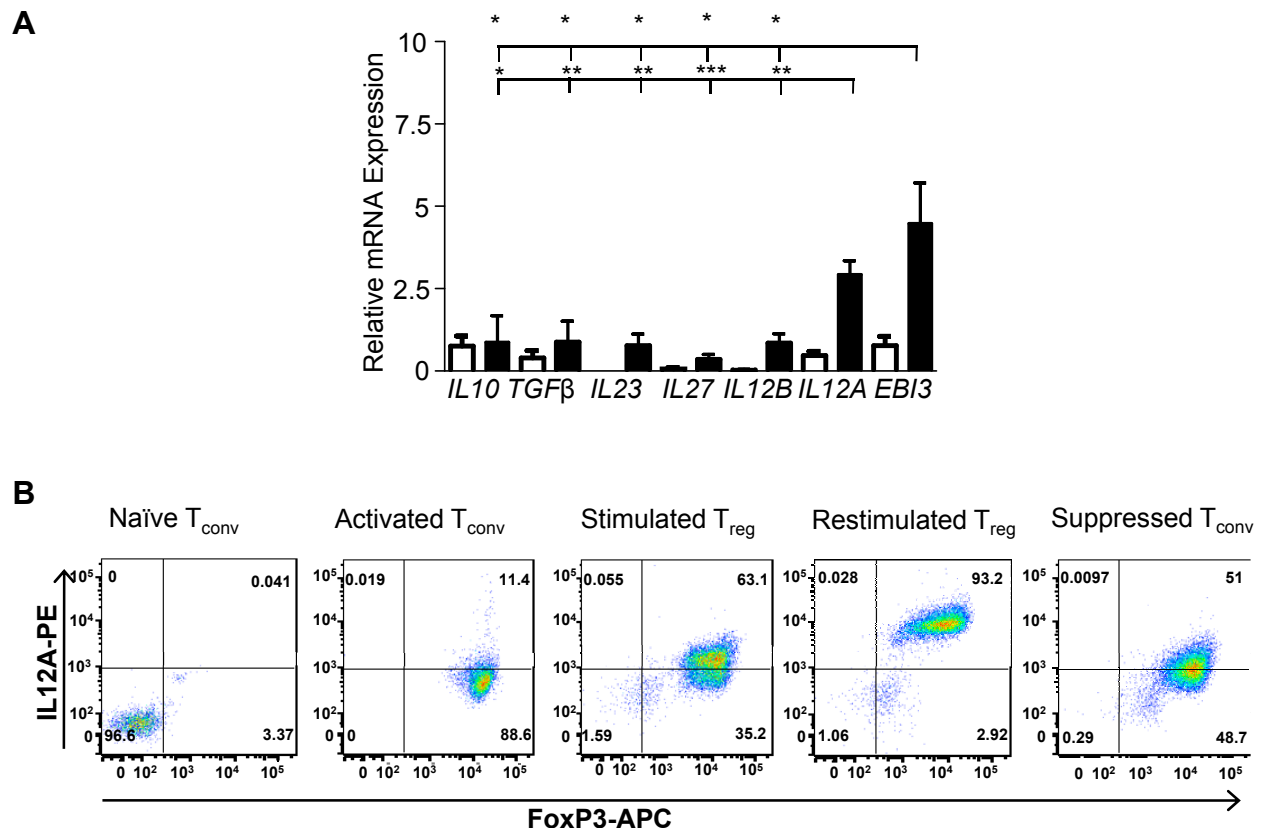

**SUPPLEMENTAL FIGURE S1:** (A)  $T_{conv}$  and  $T_{reg}$  cells were isolated from PBMCs based on  $CD4^+CD25^+CD45RA^+$  ( $T_{conv}$ ) [open bars] and  $CD4^+CD25^+CD45RA^-$  ( $T_{reg}$ ) [closed bars] expression and expanded for 9d using anti-CD3/anti-CD28-coated latex beads and IL-2 (500 IU/ml) for  $T_{regs}$  and IL-2 (100 IU/ml) for  $T_{conv}$ . After 9d, RNA was isolated, cDNA generated and qPCR analysis performed. Relative expression of mRNA encoding IL10, TGF $\beta$ , IL23, IL27, IL12B, IL12A and EBI3 was determined. Data represent the mean  $\pm$  SEM of 6 independent experiments [\*  $p < 0.05$ , \*\*  $p < 0.005$  and \*\*\*  $p < 0.001$ ]. Results are presented relative to those of naïve  $T_{conv}$  cells. (B) Indicated cell populations were stained for FoxP3 and IL-12A expression. Cells were fixed and permeabilized using 8E buffer and then stained for IL-12A. This was followed by FoxP3 staining (eBioscience, San Diego, CA). Representative dot plots are shown. Naïve and Activated  $T_{conv}$  were used as control. Foxp3 and IL-12 A expression in  $CD4^+$  gated cells. Stimulated  $T_{reg}$  refer to 9 day activated  $T_{regs}$ . Restimulated  $T_{reg}$  refer to 9+3 day activated  $T_{regs}$ . Suppressed  $T_{conv}$  are the  $T_{conv}$  isolated for cocultures.

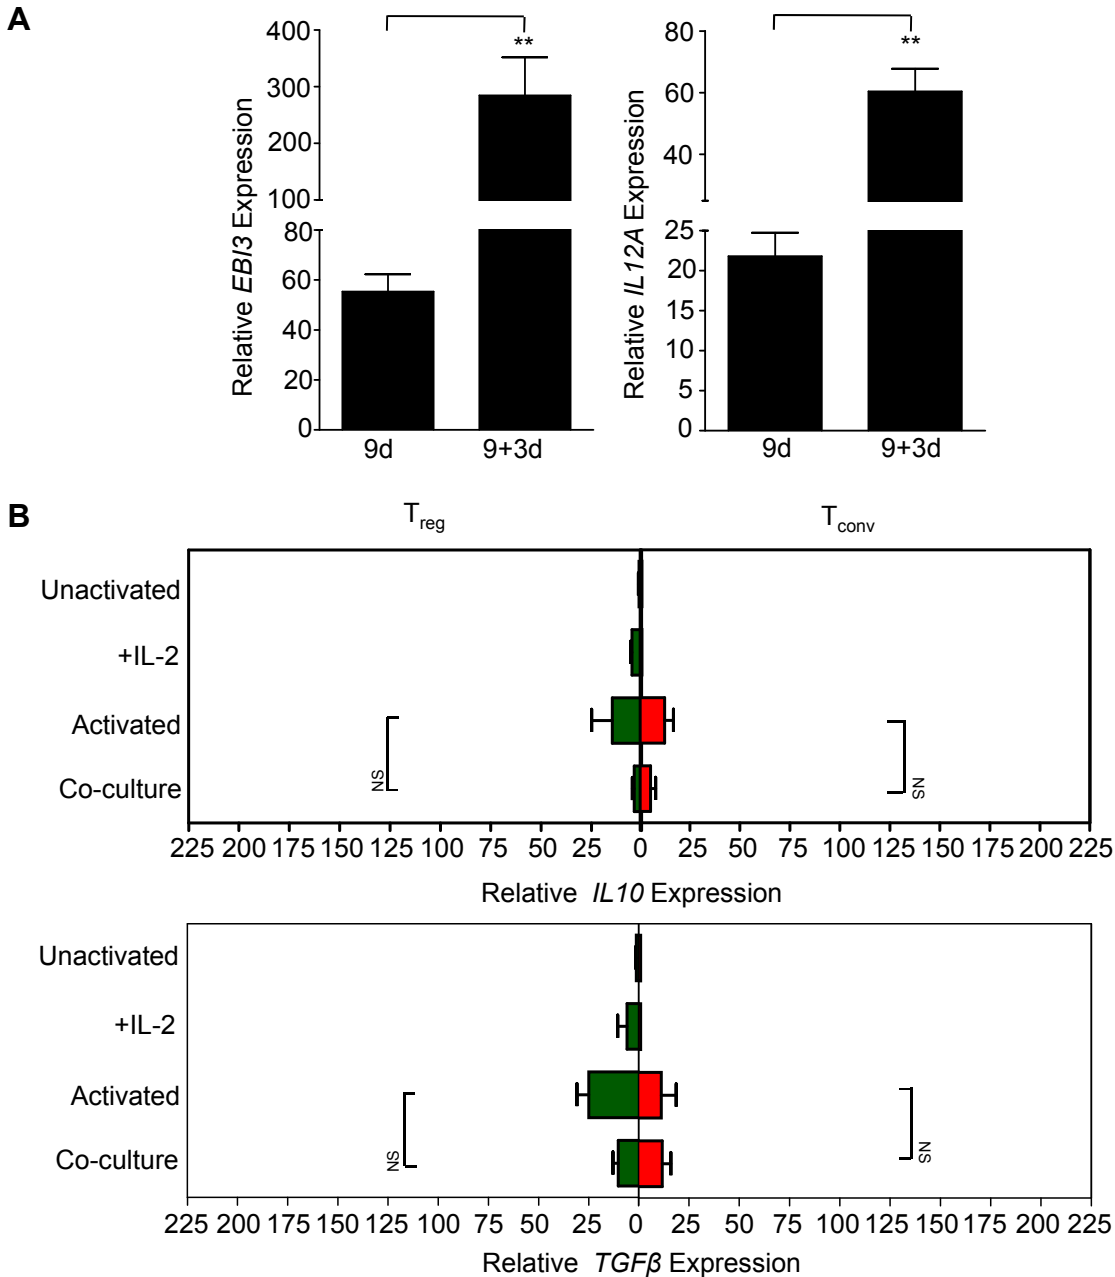

**SUPPLEMENTAL FIGURE S2:** (A) Restimulation of  $T_{reg}$  cells after 9d leads to increased *EB13* and *IL12A* expression. Human  $T_{conv}$  and  $T_{reg}$  cells were purified from umbilical cord blood by FACS based on cell surface expression of CD4 and CD25. Purified cells were expanded for 9 d, using anti-CD3/anti-CD28-coated latex beads and IL-2 (500 IU/ml). The cells were restimulated for additional 3 d, with anti-CD3/anti-CD28-coated latex beads and IL-2 (100 IU/ml) after the initial 9 d stimulation. RNA was isolated, cDNA generated and qPCR analysis performed. Relative *EB13* and *IL12A* expression. Data represents the mean  $\pm$  SEM of 5 independent experiments [\*\*  $p < 0.005$ ]. Results are presented relative to those of  $T_{conv}$  cells. The  $T_{conv}$  cells were expanded similarly to  $T_{reg}$  cells except that IL-2 was used at a final concentration of 100 IU/ml for the initial 9 d expansion. (B) Co-culturing  $T_{reg}$  and  $T_{conv}$  cells does not lead to substantial up-regulation of either IL-10 or TGF $\beta$  in either population. Activated  $T_{reg}$  cells (prepared as described in Fig. 1) were labeled with eFluor<sup>®</sup>670 and cultured with CFSE-labeled naïve  $T_{conv}$  cells in the presence or absence of IL-2, anti-CD3/CD28-coated latex beads. At the end of 3 d, cells were purified by FACS. RNA was extracted and cDNA was generated from the indicated populations. Relative *IL10* (upper panel) and *TGF $\beta$*  expression (lower panel) was determined by qPCR. Data represents the mean  $\pm$  SEM of 5 independent experiments [\*  $p < 0.05$ , \*\*  $p < 0.005$ , and \*\*\*  $p < 0.001$ ]. Results are presented relative to those of naïve  $T_{conv}$  cells.
